# Supplementary material for: Non-IPR endohedral fullerene Yb@C76: density functional theory characterization
Source: Royal Society of Chemistry journal article supplement (doi:10.1039/c1jm12230d), 2011-01-01
Supplement: c1jm12230d.pdf [file c1jm12230d.pdf]

# Supporting Information

## Non-IPR endohedral fullerene Yb@C<sub>76</sub>: Density Functional Theory Characterization†

Tao Yang,<sup>a</sup> Xiang Zhao,\*<sup>a</sup> Qian Xu,<sup>a</sup> Caihua Zhou,<sup>a</sup> Ling He<sup>a</sup> and Shigeru Nagase<sup>b</sup>

---

<sup>a</sup> Institute for Chemical Physics and Department of Chemistry, Faculty of Science,

Xi'an Jiaotong University, Xi'an 710049, China.

E-mail: [xzhao@mail.xjtu.edu.cn](mailto:xzhao@mail.xjtu.edu.cn); Fax: +86 29 8266 8559; Tel: +86 29 8266 5671

<sup>b</sup> Department of Theoretical and Computational Molecular Science,

Institute for Molecular Science, Okazaki 444-8585, Japan

1. Relative energies of all IPR, PA=1 and main PA=2 isomers of di-anion C<sub>76</sub><sup>2-</sup> and monometallofullerenes Yb@C<sub>76</sub>.

It is generally proposed that fullerene isomers with three or more fused pentagons cannot be efficiently stabilized by one metal atom and will thus be unstable. Hence, in this work only IPR isomers and non-IPR isomers with adjacent pentagons less than three have been taken into consideration. The number of such isomers is 154 for C<sub>76</sub>, including two IPR isomers encoded by 19150:*D*<sub>2</sub> and 19151:*T*<sub>d</sub>. All these isomers at di-anion state were optimized at AM1 level. The further optimizations on these most stable anions were performed at the hybrid density functional theory B3LYP level with the split-valence d-polarized 6-31G\* basis set. The molecular structures of endohedral fullerene Yb@C<sub>76</sub> were optimized at B3LYP/6-31G\*-CEP level (6-31G\*

basis set for C atoms and CEP-4G basis with the corresponding relativistic effective core potential (ECP) for Yb). All DFT calculations were carried out in the Gaussian 03 program. The calculated results IPR, PA=1 and main PA=2 isomers have been collected in the Table S1. It's interesting that the energy order of Yb@19138: $C_{2v}$  and Yb@17459: $C_1$  have changed when using the 6-31G\* basis set. To further confirm the 6-31G\* giving better results, the 4-31G basis set have been employed to calculate the Yb@ $C_{76}$  isomers. It is shown that the results are in good agreement with that of 6-31G\*. Thus, it's reasonable to use the energy results calculated at 6-31G\* level as the final results.

**Table S1** Relative energies of all IPR, PA=1 and main PA=2 isomers of di-anion  $C_{76}^{2-}$  and monometallofullerenes Yb@ $C_{76}$ .

| $C_{76}$<br>spiral ID | PA | Sym.     | $C_{76}^{-2}$                    |           | Yb@ $C_{76}$                    |           | Yb@ $C_{76}$              |           | Yb@ $C_{76}$                     |           |
|-----------------------|----|----------|----------------------------------|-----------|---------------------------------|-----------|---------------------------|-----------|----------------------------------|-----------|
|                       |    |          | $\Delta E$<br>6-31G*<br>kcal/mol | Gap<br>eV | $\Delta E$<br>3-21G<br>kcal/mol | Gap<br>eV | $\Delta E$<br>4-31G<br>eV | Gap<br>eV | $\Delta E$<br>6-31G*<br>kcal/mol | Gap<br>eV |
| 19150                 | 0  | $D_2$    | 11.1                             | 0.89      | 14.8                            | 1.01      | 14.6                      | 1.01      | 15.9                             | 1.00      |
| 19138                 | 1  | $C_{2v}$ | 0.0                              | 1.40      | 1.8                             | 1.40      | 0.0                       | 1.37      | 0.0                              | 1.40      |
| 19151                 | 0  | $T_d$    | 2.2                              | 0.76      | 8.4                             | 0.97      | 5.1                       | 0.95      | 5.8                              | 0.97      |
| 19142                 | 1  | $C_s$    | 10.4                             | 1.37      | 18.0                            | 1.15      | 17.4                      | 1.13      | 17.5                             | 1.15      |
| 17459                 | 1  | $C_1$    | 3.2                              | 1.55      | 0.0                             | 1.71      | 0.3                       | 1.69      | 1.0                              | 1.69      |
| 17418                 | 1  | $C_1$    | 14.7                             | 1.26      | 10.2                            | 1.26      | 12.0                      | 1.25      | 13.1                             | 1.24      |
| 17750                 | 1  | $C_1$    | 18.3                             | 1.05      | 12.1                            | 1.26      | 13.9                      | 1.25      | 14.7                             | 1.25      |
| 17894                 | 1  | $C_1$    | 11.2                             | 1.19      | 6.5                             | 1.44      | 7.5                       | 1.43      | 8.3                              | 1.41      |
| 18632                 | 1  | $C_1$    | 17.0                             | 1.35      | 14.2                            | 1.52      | 16.3                      | 1.49      | 16.8                             | 1.49      |
| 17646                 | 1  | $C_2$    | 11.5                             | 1.81      | 5.7                             | 1.93      | 7.8                       | 1.91      | 8.8                              | 1.88      |
| 17410                 | 1  | $C_s$    | 16.9                             | 1.72      | 11.9                            | 1.75      | 14.2                      | 1.74      | 15.2                             | 1.70      |
| 18439                 | 1  | $C_1$    | 28.0                             | 1.24      |                                 |           |                           |           | 23.7                             | 1.57      |
| 18542                 | 1  | $C_1$    | 20.4                             | 0.97      | 14.7                            | 1.16      | 16.9                      | 1.15      | 17.4                             | 1.16      |
| 18720                 | 1  | $C_1$    | 37.7                             | 1.07      |                                 |           |                           |           | 32.5                             | 1.21      |
| 18944                 | 2  | $C_2$    | 13.0                             | 1.67      | 21.1                            | 1.16      | 21.8                      | 1.34      | 20.9                             | 1.38      |
| 18943                 | 2  | $C_1$    | 17.6                             | 1.72      |                                 |           |                           |           | 24.9                             | 1.41      |

For the two most stable isomers, Yb@19138: $C_{2v}$  and Yb@17459: $C_1$ , we have also

calculated the singlet-triplet splitting energy  $\Delta E(S-T)$ . The results show that these energies are 12.6 kcal/mol and 19.9 kcal/mol for Yb@19138: $C_{2v}$  and Yb@17459: $C_1$  respectively, implying that the ground state for two isomers is the single state. Furthermore, it implies that triplet state would be reached more easily for Yb@19138: $C_{2v}$  than Yb@17459: $C_1$ .

## 2. Optimized Cartesian coordinates of the two Yb@ $C_{76}$ structures.

The optimization of mono-metallofullerenes Yb@ $C_{76}$  was performed at B3LYP/6-31G\*-CEP level. The Cartesian coordinates of Yb@19138: $C_{2v}$  and Yb@17459: $C_1$  structures are presented respectively.

xyz-file of Yb@19138: $C_{2v}$ :

|   |           |           |           |
|---|-----------|-----------|-----------|
| C | 0.900116  | -0.709918 | -3.697035 |
| C | -0.498991 | -1.141829 | -3.693748 |
| C | 1.910346  | -1.464288 | -3.032849 |
| C | 1.522127  | -2.691798 | -2.319480 |
| C | 0.146753  | -3.094878 | -2.356013 |
| C | -0.847139 | -2.312337 | -3.052015 |
| C | -1.897985 | -3.253419 | -1.225354 |
| C | -2.102525 | -2.385729 | -2.345525 |
| C | -0.500353 | -3.665068 | -1.225469 |
| C | -0.496831 | 1.142030  | -3.693337 |
| C | -1.365362 | 0.000917  | -3.664695 |
| C | 0.901455  | 0.707470  | -3.696774 |
| C | -3.009254 | -1.270711 | -2.301837 |
| C | -2.593770 | 0.001947  | -2.918392 |
| C | -3.908997 | -1.245298 | -1.179127 |
| C | -3.646805 | -2.064765 | -0.000388 |
| C | -2.595352 | -3.037839 | -0.000510 |
| C | -4.437160 | 0.003037  | 0.716941  |
| C | -4.437095 | 0.003292  | -0.717065 |
| C | -3.909113 | -1.245714 | 1.178615  |
| C | -3.006869 | 1.275177  | -2.301401 |

|   |           |           |           |
|---|-----------|-----------|-----------|
| C | -3.906641 | 1.251048  | -1.178686 |
| C | 0.152599  | 3.093380  | -2.354903 |
| C | -0.842768 | 2.312961  | -3.051182 |
| C | 1.527203  | 2.687672  | -2.318510 |
| C | 1.913100  | 1.459688  | -3.032317 |
| C | -2.098010 | 2.388471  | -2.344664 |
| C | -1.891847 | 3.255390  | -1.224196 |
| C | -0.493433 | 3.664380  | -1.224156 |
| C | -3.642911 | 2.069594  | 0.000348  |
| C | -2.589611 | 3.040676  | 0.000575  |
| C | 3.030931  | 0.712497  | -2.568729 |
| C | 3.029583  | -0.719364 | -2.568988 |
| C | 3.812016  | 1.153820  | -1.418563 |
| C | 3.404289  | 2.284187  | -0.723023 |
| C | 2.267531  | 3.059346  | -1.171023 |
| C | 3.809830  | -1.162561 | -1.418973 |
| C | 4.282512  | -0.004942 | -0.704885 |
| C | -3.906753 | 1.250621  | 1.179062  |
| C | -3.007096 | 1.274350  | 2.301874  |
| C | -2.594064 | 0.000907  | 2.918464  |
| C | -3.009484 | -1.271526 | 2.301408  |
| C | -1.898108 | -3.253853 | 1.224328  |
| C | -2.102760 | -2.386558 | 2.344783  |
| C | -0.843077 | 2.311872  | 3.052247  |
| C | -2.098248 | 2.387634  | 2.345630  |
| C | -0.497206 | 1.140714  | 3.694024  |
| C | -1.365732 | -0.000387 | 3.664889  |
| C | -1.891971 | 3.254952  | 1.225491  |
| C | -0.847448 | -2.313423 | 3.051433  |
| C | 0.146514  | -3.095717 | 2.355252  |
| C | -0.500476 | -3.665503 | 1.224439  |
| C | 0.205353  | -3.861087 | -0.000514 |
| C | -0.499366 | -1.143145 | 3.693622  |
| C | 0.899743  | -0.711236 | 3.697203  |
| C | 1.910039  | -1.465369 | 3.032847  |
| C | 1.521891  | -2.692623 | 2.318998  |
| C | 0.901082  | 0.706151  | 3.697448  |
| C | -0.493558 | 3.663944  | 1.225742  |
| C | 0.152361  | 3.092542  | 2.356351  |
| C | 1.912793  | 1.458606  | 3.033362  |
| C | 1.526970  | 2.686847  | 2.319955  |
| C | 3.399889  | -2.292658 | 0.723694  |
| C | 2.261636  | -3.065689 | 1.171585  |
| C | 3.399963  | -2.292399 | -0.723840 |

|    |           |           |           |
|----|-----------|-----------|-----------|
| C  | 2.261755  | -3.065271 | -1.172122 |
| C  | 1.599835  | -3.586794 | -0.000396 |
| C  | 3.809687  | -1.163068 | 1.419274  |
| C  | 3.029324  | -0.720280 | 2.569368  |
| C  | 3.030671  | 0.711582  | 2.569619  |
| C  | 3.811871  | 1.153313  | 1.419689  |
| C  | 4.282440  | -0.005194 | 0.705646  |
| C  | 3.404216  | 2.283929  | 0.724512  |
| C  | 2.267414  | 3.058930  | 1.172675  |
| C  | 1.606594  | 3.581694  | 0.000885  |
| C  | 0.212639  | 3.858638  | 0.000863  |
| Yb | -1.939003 | 0.000750  | -0.000007 |

xyz-file of Yb@17459:C<sub>1</sub>:

|   |           |           |           |
|---|-----------|-----------|-----------|
| C | -0.015737 | -0.065775 | 0.111266  |
| C | 1.370549  | -0.057514 | 0.110734  |
| C | 2.106782  | 1.185499  | 0.105432  |
| C | 3.296430  | 0.975818  | -0.671971 |
| C | 3.935933  | 2.042422  | -1.351049 |
| C | 4.586002  | 1.736098  | -2.585742 |
| C | 4.727536  | 2.724182  | -3.620501 |
| C | 4.657245  | 2.043103  | -4.888260 |
| C | 4.167352  | 2.691920  | -6.069862 |
| C | 3.405873  | 1.863897  | -6.970865 |
| C | 2.205386  | 2.385144  | -7.611940 |
| C | 1.196767  | 1.348093  | -7.608868 |
| C | -0.159785 | 1.594392  | -7.240102 |
| C | -0.925810 | 0.494613  | -6.640590 |
| C | -2.028000 | 0.789549  | -5.719565 |
| C | -2.402439 | -0.162443 | -4.724789 |
| C | -2.795983 | 0.238432  | -3.402602 |
| C | -2.349667 | -0.784803 | -2.466283 |
| C | -1.894680 | -0.421970 | -1.206497 |
| C | -0.734597 | -1.069417 | -0.636189 |
| C | -0.726309 | 1.201251  | 0.000590  |
| C | -1.877640 | 0.983274  | -0.819225 |
| C | -2.365793 | 1.993550  | -1.693413 |
| C | -2.837185 | 1.603545  | -3.030758 |
| C | -2.709290 | 2.539892  | -4.095785 |
| C | -2.305239 | 2.144910  | -5.405652 |
| C | -1.557294 | 3.231329  | -6.006914 |
| C | -0.517849 | 2.991806  | -6.938251 |
| C | 0.468459  | 4.033027  | -7.066580 |

|   |           |           |           |
|---|-----------|-----------|-----------|
| C | 1.838043  | 3.728779  | -7.460535 |
| C | 2.726099  | 4.607666  | -6.750237 |
| C | 3.823108  | 4.095523  | -5.967086 |
| C | 3.734136  | 4.726529  | -4.652250 |
| C | 4.167241  | 4.034700  | -3.466745 |
| C | 3.490848  | 4.335043  | -2.247047 |
| C | 3.388536  | 3.348174  | -1.184123 |
| C | 2.155935  | 3.534641  | -0.488927 |
| C | 1.439482  | 2.439952  | 0.084077  |
| C | -0.028670 | 2.443925  | 0.000497  |
| C | -0.673418 | 3.512288  | -0.686593 |
| C | -1.805790 | 3.289148  | -1.518566 |
| C | -1.723994 | 4.236079  | -2.625128 |
| C | -2.183815 | 3.866032  | -3.873350 |
| C | -1.471490 | 4.297392  | -5.044648 |
| C | -0.325830 | 5.144442  | -4.955724 |
| C | 0.547002  | 5.114660  | -6.087298 |
| C | 1.931649  | 5.466139  | -5.928785 |
| C | 2.518477  | 5.532723  | -4.627144 |
| C | 1.677726  | 5.576327  | -3.459263 |
| C | 2.272674  | 5.096005  | -2.249964 |
| C | 1.467920  | 4.613708  | -1.155455 |
| C | 0.090574  | 4.608571  | -1.272836 |
| C | -0.539306 | 5.042697  | -2.487416 |
| C | 0.221587  | 5.462332  | -3.620934 |
| C | 2.096721  | -1.015964 | -0.702761 |
| C | 3.249857  | -0.359925 | -1.241707 |
| C | 3.665861  | -0.590027 | -2.579040 |
| C | 4.414277  | 0.455098  | -3.200761 |
| C | 4.418620  | 0.645018  | -4.619283 |
| C | 3.611234  | -0.155711 | -5.473696 |
| C | 3.165997  | 0.465488  | -6.679099 |
| C | 1.861531  | 0.145640  | -7.189703 |
| C | 1.135461  | -0.890701 | -6.651914 |
| C | -0.282100 | -0.764863 | -6.484557 |
| C | -0.657441 | -1.703839 | -5.449235 |
| C | -1.720235 | -1.434006 | -4.609049 |
| C | -1.669001 | -1.817511 | -3.211834 |
| C | -0.513578 | -2.408003 | -2.690734 |
| C | -0.031942 | -2.027110 | -1.386126 |
| C | 1.412819  | -1.962732 | -1.452887 |
| C | 1.830017  | -2.226325 | -2.818804 |
| C | 2.896982  | -1.508444 | -3.427578 |
| C | 2.835488  | -1.260339 | -4.877351 |

|    |          |           |           |
|----|----------|-----------|-----------|
| C  | 1.678540 | -1.691242 | -5.573812 |
| C  | 0.559336 | -2.286826 | -4.902493 |
| C  | 0.642248 | -2.589064 | -3.554418 |
| Yb | 1.740102 | 3.012053  | -4.917527 |

**Reference:**

M. J. Frisch, G. W. Trucks, H. B. Schlegel, G. E. Scuseria, M. A. Robb, J. R. Cheeseman, J. A. Montgomery, J. T. Vreven, K. N. Kudin, J. C. Burant, J. M. Millam, S. S. Iyengar, J. Tomasi, V. Barone, B. Mennucci, M. Cossi, G. Scalmani, N. Rega, G. A. Petersson, H. Nakatsuji, M. Hada, M. Ehara, K. Toyota, R. Fukuda, J. Hasegawa, M. Ishida, T. Nakajima, Y. Honda, O. Kitao, H. Nakai, M. Klene, X. Li, J. E. Knox, H. P. Hratchian, J. B. Cross, V. Bakken, C. Adamo, J. Jaramillo, R. Gomperts, R. E. Stratmann, O. Yazyev, A. J. Austin, R. Cammi, C. Pomelli, J. W. Ochterski, P. Y. Ayala, K. Morokuma, G. A. Voth, P. Salvador, J. J. Dannenberg, V. G. Zakrzewski, S. Dapprich, A. D. Daniels, M. C. Strain, O. Farkas, D. K. Malick, A. D. Rabuck, K. Raghavachari, J. B. Foresman, J. V. Ortiz, Q. Cui, A. G. Baboul, S. Clifford, J. Cioslowski, B. B. Stefanov, G. Liu, A. Liashenko, P. Piskorz, I. Komaromi, R. L. Martin, D. J. Fox, T. Keith, M. A. Al-Laham, C. Y. Peng, A. Nanayakkara, M. Challacombe, P. M. W. Gill, B. Johnson, W. Chen, M. W. Wong, C. Gonzalez and J. A. Pople, Gaussian 03 (*Revision E.01*), Gaussian, Inc., Wallingford CT, 2004.
